# Supplementary material for: Blockade of LAG-3 in PD-L1-Deficient Mice Enhances Clearance of Blood Stage Malaria Independent of Humoral Responses
Source: PubMed Central journal article supplement (PMC7840658; doi:10.3389/fimmu.2020.576743), 2021-01-14
Supplement: DataSheet_2.pdf [file DataSheet_2.pdf]

**Supplementary Table 1.** List of antibodies used for flow cytometry analyses and in vivo blocking or cell depletion.

| Reagent/Antibody Target           | Fluorochrome                                                | Clone             | Purchased from                         |
|-----------------------------------|-------------------------------------------------------------|-------------------|----------------------------------------|
| <b>FACS</b>                       |                                                             |                   |                                        |
| anti-rat                          | biotin                                                      | Polyclonal (Goat) | Invitrogen                             |
| B220                              | PE-Cy7                                                      | RA3-6B2           | eBiosciences                           |
| BCL6                              | PE, APC-Cy7                                                 | K112-91           | BD Biosciences                         |
| CCR5                              | PerCP-eF710                                                 | 7A4               | Invitrogen                             |
| CCR7 (CD197)                      | BV786                                                       | 4B12              | BD Biosciences                         |
| CD115                             | PE-Cy7                                                      | AFS98             | eBiosciences                           |
| CD11a                             | APC, PE, PE-Cy7, PerCP-eF710                                | M15/4, M17/4      | eBiosciences, Biolegend                |
| CD11b                             | BB700, PerCP-Cy5.5                                          | M1/70             | BD Pharmingen                          |
| CD11c                             | biotin, APC                                                 | HL3               | BD Pharmingen                          |
| CD122 (IL-2Rb)                    | BUV496                                                      | TM-b1             | BD Biosciences                         |
| CD127 (IL-7Ra)                    | BV421                                                       | A7R34             | BD Biosciences                         |
| CD138                             | PE                                                          | 281-2             | Biolegend                              |
| CD169                             | PE                                                          | SER-4             | eBiosciences                           |
| CD19                              | AF700, PerCP-Cy5.5                                          | 1D3               | BD Pharmingen                          |
| CD27                              | BV650                                                       | LG.3A10           | BD Biosciences                         |
| CD3                               | BV510, FITC, PerCP-Cy5.5, PE-Cy7, BV750                     | 145-2C11 or 17A2  | eBiosciences, BD Biosciences           |
| CD4                               | Pacific Blue, PE, Alexa 700, PE-Cy7, PerCP-Cy5.5            | RM4-5             | eBiosciences, BD Pharmingen, Biolegend |
| CD44                              | SB436                                                       | IM7               | eBiosciences                           |
| CD45                              | Alexa 700, APC                                              | 30F11             | eBiosciences                           |
| CD49d                             | PE                                                          | R1-2              | eBiosciences                           |
| CD62L                             | BV570                                                       | MEL-14            | BioLegend                              |
| CD8a                              | FITC, PE, PerCP.Cy5.5, APC, Alexa 700, BV510, PE-Cy7, AF532 | 53-6.7            | eBiosciences                           |
| CD95                              | FITC, BB515                                                 | Jo2               | BD Biosciences                         |
| CX3CR1                            | BV510                                                       | SA011F11          | BioLegend                              |
| CXCR3                             | PerCP.Cy5.5                                                 | CXCR3-173         | BioLegend                              |
| CXCR5                             | unconjugated, PE-Cy7                                        | 2G8               | BD Biosciences                         |
| EOMES                             | eFluor660                                                   | Dan11mag          | eBiosciences                           |
| F4/80                             | BV421                                                       | BM8               | BioLegend                              |
| FoxP3                             | eF450, AF488                                                | FJK165, FJK-16s   | eBiosciences                           |
| GL7                               | eF450                                                       | GL7               | eBiosciences                           |
| Granzyme B                        | APC                                                         | MHGB05            | Invitrogen                             |
| ICAM1                             | PE                                                          | 3E2               | BD Biosciences                         |
| ICOS                              | APC, PerCP-eF710, PE-Cy7                                    | C398.4A, 15F9     | eBiosciences                           |
| IFNg                              | AF700, PE-Cy7                                               | XMG1.2            | eBiosciences                           |
| IgD                               | PerCP-Cy5.5                                                 | 11-26c.2a         | BD Pharmingen                          |
| IgG                               | AF700                                                       | Poly4053          | Biolegend                              |
| IgM                               | APC                                                         | 11-41             | eBiosciences                           |
| IL-2                              | eFluor 450                                                  | JES6-5H4          | eBiosciences                           |
| Ki67                              | FITC, eF450, PE-Cy5                                         | SolA15            | eBiosciences                           |
| KLRG1                             | BV605                                                       | 2F1               | BD Biosciences                         |
| LAG3                              | APC                                                         | C9BTW             | BD Pharmingen                          |
| Ly6C                              | AF700                                                       | AL-21             | BD Pharmingen                          |
| Ly6G                              | FITC                                                        | 1A8               | BD Biosciences                         |
| MHCII                             | PE-Cy7                                                      | M5/114.15.2       | Biolegend                              |
| PD1                               | PE, FITC, BUV737                                            | J43, RPM1-30      | BD Biosciences, eBiosciences           |
| PNA                               | FITC                                                        |                   | Sigma-Aldrich                          |
| SCA-1 (Ly6A/E)                    | BUV395                                                      | D7                | BD Biosciences                         |
| Streptavidin                      | BUV661, APC-Cy7, PE-Cy7                                     |                   | eBiosciences, BD Biosciences           |
| Tbet                              | BV711                                                       | 4B10              | Biolegend                              |
| TCF1                              | AF488                                                       | 812145            | R&D                                    |
| TNFA                              | PerCP-Cy5.5                                                 | MP6-XT22          | BD Biosciences                         |
| <b>In vivo depletion antibody</b> |                                                             |                   |                                        |
| anti-CD4                          |                                                             | GK1.5             |                                        |
| anti-CD8b                         |                                                             | H35               |                                        |
| <b>In vivo blocking antibody</b>  |                                                             |                   |                                        |
| polyclonal Rat IgG                |                                                             | N/A               | BioXcell                               |
| anti-LAG3                         |                                                             | C9B7W             | BioXcell                               |
| anti-PD-1                         |                                                             | RMP1-14           | BioXcell                               |
| anti-PD-L1                        |                                                             | 10F.9G2           | BioXcell                               |
